# Supplementary material for: The BBSome Controls Energy Homeostasis by Mediating the Transport of the Leptin Receptor to the Plasma Membrane
Source: PubMed Central journal article supplement (PMC4771807; doi:10.1371/journal.pgen.1005890), 2016-02-29
Supplement: pgen.1005890.s011.pdf [file pgen.1005890.s011.pdf]

| Name                                                               | Sense (5'-3')             | Anti-sense (5'-3')          |
|--------------------------------------------------------------------|---------------------------|-----------------------------|
| <u>Genotyping</u>                                                  |                           |                             |
| <i>Cre</i>                                                         | ACCTGAAGATGTTTCGCGATTATCT | ACCGTCAGTACGTGAGATATCTT     |
| <i>Bbs1</i>                                                        | ACATCCACACCTTCTCCTCCT     | GCCTACCTTGTACTCCCCATC       |
| <i>lft88</i>                                                       | GCCTCCTGTTTCTTGACAACAGTG  | GGTCCTAACAAGTAAGCCCAGTGTTTC |
| <i>td-Tomato</i>                                                   | GGCATTAAAGCAGCGTATCC      | CTGTTCTGTACGGCATGC          |
| <u><i>Bbs1</i> gene expression in brain and peripheral tissues</u> |                           |                             |
| $\beta$ -actin                                                     | CATCCTCTTCCTCCCTGGAGA     | TTCCATACCCAAGAAGGAAGG       |
| <i>Bbs1</i>                                                        | ACTGGCAGATTTGCATGGCGA     | TCAGTGCCTAGCACCAGACAG       |
| <i>Bbs1</i> (qRT-PCR)                                              | ACATCCACACCTTCTCCTCCT     | CCAGCTTGTACTCCCCATCG        |
| <u>Genes encoding the BBSome and CLP proteins</u>                  |                           |                             |
| <i>Bbs1</i>                                                        | TTGTCTGTGCAGTCACTCAG      | CGTCCTCATCTGCCAGGTT         |
| <i>Bbs2</i>                                                        | GAGCTTCTTGTTGGATCTGAAGA   | GACTGCCATACATAGGACACAG      |
| <i>Bbs4</i>                                                        | CAAGCATGACCTGACTTACATAAT  | CACACCAAGCTGCAAGTAGAGCA     |
| <i>Bbs5</i>                                                        | GGAGCATGTGTATGATAAGAT     | TCCTCCACTCTGCTGAGAGCTT      |
| <i>Bbs6</i>                                                        | TGACTCTGATGGAATCTCTAAGC   | TCTTGCAGAGCACACATCTTTCAC    |
| <i>Bbs7</i>                                                        | TCAAAGCTGTCAACACACAAG     | GTCTTAGCACTGCATAATGGA       |
| <i>Bbs8</i>                                                        | CTATCACTAGCTCATCTGGAAG    | ACATCGTTTTTCATGGTGGAGAA     |
| <i>Bbs9</i>                                                        | CCAGTGCTGCAAGTGGAAGTC     | GGTTTCCATGTTCCACATTTTC      |
| <i>Bbs10</i>                                                       | CTACCAGAGGTTGCTTCACA      | AGAGTGAGGTATAAATGCACATG     |
| <i>Bbs12</i>                                                       | GGACAGATAATAGCCACTGG      | CTTGCTGCAGACACAGACTCTG      |
| <u>Hypothalamic gene expression</u>                                |                           |                             |
| S18                                                                | ACTGCCATTAAGGGCGTGG       | CCATCCTTCACATCCTTCTG        |
| AgRP                                                               | CAGAAGCTTTGGCGGAGGT       | AGGACTCGTGCAGCCTTACAC       |
| NPY                                                                | TCAGACCTCTTAATGAAGGAAAGCA | GAGAACAAGTTTCATTTCCCATCA    |
| POMC                                                               | CTGCTTCAGACCTCCATAGATGTG  | CAGCGAGAGGTTCGAGTTTGC       |
| PTP1B                                                              | GACTCGTCAGTGCAGGATCA      | GACTCGTCAGTGCAGGATCA        |
| SOSC3                                                              | ACCAGCGCCACTTCTTCACG      | GTGGAGCATCATACTGATCC        |
| LR-RGRP                                                            | GTTTACTGGCCCCTGTTCTG      | GGCTACCACTGTTCCCAACT        |
| <u>Silencing <i>lft88</i></u>                                      |                           |                             |
| <i>lft88</i>                                                       | GCCTCCTGTTTCTTGACAACAGTG  | GGTCCTAACAAGTAAGCCCAGTGTTTC |
| hS18                                                               | ACTGCCATTAAGGGTGTGG       | CCATCCTTTACATCCTTCTG        |
